# Supplementary material for: A comprehensive organic nitrate chemistry: insights into the lifetime of atmospheric organic nitrates
Source: Copernicus journal article supplement (doi:10.5194/acp-18-15419-2018), 2018-10-26
Supplement: Supplementary file 2 [file acp-18-15419-2018-supplement.zip]

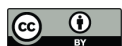

## *Supplement of*

# **A comprehensive organic nitrate chemistry: insights into the lifetime of atmospheric organic nitrates**

**Azimeh Zare et al.**

*Correspondence to:* Ronald C. Cohen ([rccohen@berkeley.edu](mailto:rccohen@berkeley.edu))

- `acp-18-15419-2018-supplement-title-page.pdf`
- `Supplements.docx`
- `Supplements_includesFigures.pdf`
- `__MACOSX`
  - `._Supplements.docx`
  - `._Supplements_includesFigures.pdf`
  - `._figS1.png`
  - `._figS2.eps`
  - `._figS3.png`
  - `._figS4.eps`
  - `._figS5.eps`
  - `._figS6.png`
- `figS1.png`
- `figS2.eps`
- `figS3.png`
- `figS4.eps`
- `figS5.eps`
- `figS6.png`

The copyright of individual parts of the supplement might differ from the CC BY 4.0 License.
